# Supplementary material
Source: publisher figshare collection journal article supplement (https://tandf.figshare.com/articles/dataset/_/7338893)
Supplement: Supplementary file 1 [file 2]

Supplementary Information for

**Physical confinement alters sarcoma cell cycle progression and division**

Rebecca A. Moriarty<sup>1</sup> and Kimberly M. Stroka<sup>1,2,3,4</sup>

- 1) Fischell Department of Bioengineering, University of Maryland, College Park, MD 20742, USA
- 2) Biophysics Program, University of Maryland, College Park, MD 20742, USA
- 3) Center for Stem Cell Biology and Regenerative Medicine, University of Maryland – Baltimore, MD 21201, USA
- 4) Marlene and Stewart Greenebaum Comprehensive Cancer Center, University of Maryland – Baltimore, MD 21201, USA

**Supplementary Table S1: Cell divisions decrease in confinement.** The mean, cell count, and ANOVA letters (from post-hoc Tukey tests) for the fraction of cells that divide across varying degrees of confinement. Groups that do not share a letter are significantly different.

| Fraction that Divide  |       |            |       |
|-----------------------|-------|------------|-------|
| Degree of Confinement | Mean  | Cell Count | ANOVA |
| 2D                    | 0.7   | 22         | A     |
| 50 $\mu\text{m}$      | 0.23  | 131        | B     |
| 20 $\mu\text{m}$      | 0.147 | 227        | BC    |
| 10 $\mu\text{m}$      | 0.155 | 99         | C     |
| 6 $\mu\text{m}$       | 0.096 | 202        | CD    |
| 3 $\mu\text{m}$       | 0.05  | 160        | D     |

**Supplementary Table S2: Cell and nuclear morphologies are altered in confinement.** The mean, cell count, and ANOVA letters (from post-hoc Tukey tests) for cell area (Fig. 2D), cell aspect ratio (Fig. 2G), nuclear area (Fig. 2E), and nuclear aspect ratio (Fig. 2H) across all degrees of confinement and 2D controls. Groups in a column that do not share a letter are significantly different.

|                  |                       | Cell Area |            |             | Cell Aspect Ratio |            |             | Nuclear Area |            |             | Nuclear Aspect Ratio |            |             |
|------------------|-----------------------|-----------|------------|-------------|-------------------|------------|-------------|--------------|------------|-------------|----------------------|------------|-------------|
| Cell Cycle Stage | Degree of Confinement | Mean      | Cell Count | ANOVA Value | Mean              | Cell Count | ANOVA Value | Mean         | Cell Count | ANOVA Value | Mean                 | Cell Count | ANOVA Value |
| G1               | 2D                    | 958.27    | 249        | A           | 3.33              | 249        | GH          | 171.91       | 208        | E           | 1.92                 | 208        | G           |
|                  | 50 $\mu$ m            | 468.91    | 144        | EFG         | 3.17              | 144        | GH          | 175.58       | 203        | E           | 1.97                 | 203        | FG          |
|                  | 20 $\mu$ m            | 440.73    | 113        | EFG         | 4.73              | 101        | FG          | 196.89       | 138        | DE          | 2.28                 | 138        | FG          |
|                  | 10 $\mu$ m            | 412.21    | 78         | EFG         | 6.74              | 78         | F           | 183.38       | 67         | E           | 2.85                 | 67         | F           |
|                  | 6 $\mu$ m             | 328.99    | 99         | G           | 15.88             | 99         | D           | 169.92       | 135        | EF          | 7.1                  | 135        | D           |
|                  | 3 $\mu$ m             | 576.61    | 87         | CDE         | 27.65             | 87         | B           | 172.72       | 94         | EF          | 11.11                | 94         | B           |
| S/G2/M           | 2D                    | 1460.17   | 246        | B           | 2.56              | 246        | H           | 284.43       | 194        | B           | 1.83                 | 194        | G           |
|                  | 50 $\mu$ m            | 759.23    | 101        | C           | 3.29              | 101        | GH          | 305.81       | 93         | B           | 1.93                 | 93         | FG          |
|                  | 20 $\mu$ m            | 683.2     | 63         | CD          | 4.98              | 63         | FG          | 356.93       | 72         | A           | 2.19                 | 72         | FG          |
|                  | 10 $\mu$ m            | 541.04    | 67         | DEF         | 9.09              | 67         | E           | 279.84       | 72         | BC          | 4.1                  | 72         | E           |
|                  | 6 $\mu$ m             | 465.94    | 60         | DEFG        | 19.47             | 60         | C           | 239.15       | 59         | CD          | 10.05                | 59         | C           |
|                  | 3 $\mu$ m             | 345.36    | 87         | FG          | 32.83             | 87         | A           | 135.09       | 80         | F           | 15.96                | 80         | A           |

**Supplementary Table S3: Nuclear morphology is altered in confinement.** Mean, cell count, and ANOVA letters (from post-hoc Tukey tests) for the major (Fig. 2J) and minor (Fig. 2K) axis of the fitted nuclear ellipse across varying degrees of confinement and cell cycle stages. Groups in a column that do not share a letter are significantly different.

| Nuclear Axis Length | Degree of Confinement | G1    |            |             | S/G2/M |            |             |
|---------------------|-----------------------|-------|------------|-------------|--------|------------|-------------|
|                     |                       | Mean  | Cell Count | ANOVA Value | Mean   | Cell Count | ANOVA Value |
| Major               | 2D                    | 11.13 | 150        | E           | 13.8   | 138        | C           |
|                     | 50 $\mu\text{m}$      | 13.52 | 66         | D           | 20.05  | 46         | B           |
|                     | 20 $\mu\text{m}$      | 15.84 | 95         | D           | 22.72  | 61         | B           |
|                     | 10 $\mu\text{m}$      | 20.26 | 38         | C           | 28.03  | 61         | A           |
|                     | 6 $\mu\text{m}$       | 28.91 | 120        | B           | 22.49  | 56         | B           |
|                     | 3 $\mu\text{m}$       | 35.36 | 94         | A           | 28.03  | 80         | A           |
| Minor               | 2D                    | 5.86  | 150        | FG          | 7.31   | 138        | E           |
|                     | 50 $\mu\text{m}$      | 6.66  | 66         | F           | 10.42  | 46         | D           |
|                     | 20 $\mu\text{m}$      | 7.26  | 95         | F           | 10.51  | 61         | D           |
|                     | 10 $\mu\text{m}$      | 7.3   | 38         | F           | 6.74   | 61         | E           |
|                     | 6 $\mu\text{m}$       | 4.11  | 120        | GH          | 2.36   | 56         | F           |
|                     | 3 $\mu\text{m}$       | 3.37  | 94         | H           | 1.83   | 80         | F           |

**Supplementary Table S4: Cell migration is altered in confinement.** Mean, cell count, and ANOVA letters (from post-hoc Tukey tests) for cell speed (Fig. 3B) and chemotactic index (Fig. 3C) of both cell cycle stages across varying degrees of confinement. Groups in a column that do not share a letter are significantly different.

| Cell Cycle Stage | Degree of Confinement | Cell Speed |       |             | Chemotactic Index |       |             |
|------------------|-----------------------|------------|-------|-------------|-------------------|-------|-------------|
|                  |                       | Mean       | Count | ANOVA Value | Mean              | Count | ANOVA Value |
| G1               | 2D                    | 38.84      | 178   | G           | 0.504             | 178   | DE          |
|                  | 50 $\mu\text{m}$      | 115.22     | 162   | B           | 0.51              | 163   | DE          |
|                  | 20 $\mu\text{m}$      | 131.4      | 136   | A           | 0.579             | 136   | CDE         |
|                  | 10 $\mu\text{m}$      | 104.55     | 52    | BCD         | 0.767             | 52    | AB          |
|                  | 6 $\mu\text{m}$       | 100.61     | 51    | BCD         | 0.634             | 51    | ABCD        |
|                  | 3 $\mu\text{m}$       | 61.87      | 86    | EF          | 0.729             | 86    | AB          |
| S/G2/M           | 2D                    | 40.01      | 154   | G           | 0.474             | 154   | E           |
|                  | 50 $\mu\text{m}$      | 97.87      | 118   | CD          | 0.531             | 118   | DE          |
|                  | 20 $\mu\text{m}$      | 107.33     | 60    | BC          | 0.611             | 60    | BCDE        |
|                  | 10 $\mu\text{m}$      | 82.7       | 66    | DE          | 0.718             | 66    | ABC         |
|                  | 6 $\mu\text{m}$       | 55.2       | 64    | FG          | 0.789             | 64    | A           |
|                  | 3 $\mu\text{m}$       | 49.92      | 69    | FG          | 0.739             | 69    | AB          |

**Supplementary Table S5: S/G2/M stage is lengthened in confinement.** Mean, cell count, and ANOVA letters (from post-hoc Tukey tests) of time cell spends in the channel (Fig. 4A) across both cell cycle stages and varying degrees of confinement. Groups in a column that do not share a letter are significantly different.

|                  | Time in Channel       |        |            |       |
|------------------|-----------------------|--------|------------|-------|
| Cell Cycle Stage | Degree of Confinement | Mean   | Cell Count | ANOVA |
| G1               | 2D                    | 282    | 10         | EF    |
|                  | 50 $\mu\text{m}$      | 316.92 | 13         | F     |
|                  | 20 $\mu\text{m}$      | 338.57 | 7          | F     |
|                  | 10 $\mu\text{m}$      | 290    | 10         | F     |
|                  | 6 $\mu\text{m}$       | 298    | 10         | F     |
|                  | 3 $\mu\text{m}$       | 317.78 | 9          | F     |
| S/G2/M           | 2D                    | 480    | 7          | DE    |
|                  | 50 $\mu\text{m}$      | 714.29 | 7          | C     |
|                  | 20 $\mu\text{m}$      | 810.19 | 3          | BC    |
|                  | 10 $\mu\text{m}$      | 650    | 2          | CD    |
|                  | 6 $\mu\text{m}$       | 972.5  | 4          | B     |
|                  | 3 $\mu\text{m}$       | 1206   | 5          | A     |

**Supplementary Table S6: Cells continue to divide less frequently after exiting confinement.**

Mean, cell count, and ANOVA letters (from post-hoc Tukey tests) for the fraction of cells that divide during and after confinement (Fig. 5B) across varying channel widths. Groups that do not share a letter are significantly different.

|                    | Fraction that Divide  |      |            |       |
|--------------------|-----------------------|------|------------|-------|
|                    | Degree of Confinement | Mean | Cell Count | ANOVA |
| During Confinement | 2D                    | 0.7  | 22         | A     |
|                    | 50 $\mu\text{m}$      | 0.23 | 131        | BC    |
|                    | 20 $\mu\text{m}$      | 0.15 | 227        | CDE   |
|                    | 10 $\mu\text{m}$      | 0.15 | 99         | BCDE  |
|                    | 6 $\mu\text{m}$       | 0.1  | 202        | DF    |
|                    | 3 $\mu\text{m}$       | 0.05 | 160        | EF    |
| Post-Confinement   | 50 $\mu\text{m}$      | 0.45 | 7          | AB    |
|                    | 20 $\mu\text{m}$      | 0.24 | 10         | BCDEF |
|                    | 10 $\mu\text{m}$      | 0.22 | 13         | BCDEF |
|                    | 6 $\mu\text{m}$       | 0.2  | 10         | BCDEF |
|                    | 3 $\mu\text{m}$       | 0.25 | 29         | BCD   |

**Supplementary Table S7: Cell cycle stage time returns to normal after cells leave confinement.** Mean, cell count, and ANOVA letters (from post-hoc Tukey tests) for the time cells spend in each stage of the cell cycle, during and post confinement, across varying degrees of confinement (Fig. 5C). Groups that do not share a letter are significantly different.

|                    | Cell Cycle Stage | Time in Channel       |         |            |       |
|--------------------|------------------|-----------------------|---------|------------|-------|
|                    |                  | Degree of Confinement | Mean    | Cell Count | ANOVA |
| During Confinement | G1               | 2D                    | 282     | 10         | F     |
|                    | S/G2/M           | 2D                    | 480     | 7          | DE    |
|                    | G1               | 50 $\mu\text{m}$      | 316.923 | 13         | F     |
|                    |                  | 20 $\mu\text{m}$      | 338.571 | 7          | EF    |
|                    |                  | 10 $\mu\text{m}$      | 290     | 10         | F     |
|                    |                  | 6 $\mu\text{m}$       | 298     | 10         | F     |
|                    |                  | 3 $\mu\text{m}$       | 317.778 | 9          | EF    |
|                    | S/G2/M           | 50 $\mu\text{m}$      | 714.286 | 7          | C     |
|                    |                  | 20 $\mu\text{m}$      | 810.187 | 3          | BC    |
|                    |                  | 10 $\mu\text{m}$      | 650     | 2          | CD    |
|                    |                  | 6 $\mu\text{m}$       | 972.5   | 4          | B     |
|                    |                  | 3 $\mu\text{m}$       | 1206    | 5          | A     |
| Post- Confinement  | G1               | 50 $\mu\text{m}$      | 259.091 | 11         | F     |
|                    |                  | 20 $\mu\text{m}$      | 266.667 | 9          | F     |
|                    |                  | 10 $\mu\text{m}$      | 370     | 11         | EF    |
|                    |                  | 6 $\mu\text{m}$       | 318.889 | 9          | EF    |
|                    |                  | 3 $\mu\text{m}$       | 327.5   | 8          | EF    |
|                    | S/G2/M           | 50 $\mu\text{m}$      | 598.333 | 6          | CD    |
|                    |                  | 20 $\mu\text{m}$      | 728.333 | 6          | B     |
|                    |                  | 10 $\mu\text{m}$      | 755     | 6          | BC    |
|                    |                  | 6 $\mu\text{m}$       | 716.667 | 6          | C     |
|                    |                  | 3 $\mu\text{m}$       | 680     | 2          | BCD   |



**Supplementary Table S8: Cell and nuclear area, but not shape are altered post-confinement.** Mean, cell count, and ANOVA letters (from post-hoc Tukey tests) for cell area (Fig. 5D), cell aspect ratio (Fig. 5F), nuclear area (Fig. 5E), and nuclear aspect ratio (Fig. 5G) in both stages of the cell cycle and across varying degrees of confinement. Groups in a column that do not share a letter are significantly different.

|                    |                  |                       | Cell Area |            |             | Cell Aspect Ratio |            |             | Nuclear Area |            |             | Nuclear Aspect Ratio |            |             |
|--------------------|------------------|-----------------------|-----------|------------|-------------|-------------------|------------|-------------|--------------|------------|-------------|----------------------|------------|-------------|
|                    | Cell Cycle Stage | Degree of Confinement | Mean      | Cell Count | ANOVA Value | Hide              | Cell Count | ANOVA Value | Mean         | Cell Count | ANOVA Value | Mean                 | Cell Count | ANOVA Value |
|                    | G1               | 2D                    | 958.27    | 249        | BC          | 3.33              | 249        | HI          | 171.91       | 208        | F           | 1.92                 | 208        | GH          |
|                    | S/G2/M           | 2D                    | 1460.17   | 246        | A           | 2.56              | 246        | HI          | 284.43       | 194        | B           | 1.83                 | 194        | GH          |
| During Confinement | G1               | 50 $\mu$ m            | 468.91    | 144        | JKL         | 3.17              | 144        | HI          | 175.58       | 203        | F           | 1.97                 | 203        | GH          |
|                    |                  | 20 $\mu$ m            | 440.73    | 113        | JKL         | 4.73              | 101        | G           | 196.89       | 138        | EF          | 2.28                 | 138        | FG          |
|                    |                  | 10 $\mu$ m            | 412.21    | 78         | JKL         | 6.74              | 78         | F           | 183.38       | 67         | EF          | 2.85                 | 67         | F           |
|                    |                  | 6 $\mu$ m             | 328.99    | 99         | L           | 15.88             | 99         | D           | 169.92       | 135        | FG          | 7.1                  | 135        | D           |
|                    |                  | 3 $\mu$ m             | 576.61    | 87         | KL          | 27.65             | 87         | B           | 172.72       | 94         | FG          | 11.11                | 94         | B           |
|                    | S/G2/M           | 50 $\mu$ m            | 759.23    | 101        | DEFG        | 3.29              | 101        | GHI         | 305.81       | 93         | B           | 1.93                 | 93         | GH          |
|                    |                  | 20 $\mu$ m            | 683.2     | 63         | EFGHI       | 4.98              | 63         | FG          | 356.93       | 72         | A           | 2.19                 | 72         | FGH         |
|                    |                  | 10 $\mu$ m            | 541.04    | 67         | HIJK        | 9.09              | 67         | E           | 279.84       | 72         | BC          | 4.1                  | 72         | E           |
|                    |                  | 6 $\mu$ m             | 465.94    | 60         | IJKL        | 19.47             | 60         | C           | 239.15       | 59         | CD          | 10.05                | 59         | C           |
|                    |                  | 3 $\mu$ m             | 345.36    | 87         | GHIJ        | 32.83             | 87         | A           | 135.09       | 80         | GH          | 15.96                | 80         | A           |
| Post-Confinement   | G1               | 50 $\mu$ m            | 659.085   | 152        | GH          | 3.73              | 152        | GH          | 131.195      | 142        | EF          | 1.89                 | 142        | GH          |
|                    |                  | 20 $\mu$ m            | 617.658   | 161        | GHI         | 2.65              | 161        | HI          | 120.362      | 170        | H           | 1.63                 | 170        | H           |
|                    |                  | 10 $\mu$ m            | 693.582   | 217        | GH          | 2.92              | 217        | HI          | 127.228      | 224        | H           | 1.73                 | 224        | H           |
|                    |                  | 6 $\mu$ m             | 638.496   | 165        | GHI         | 2.89              | 165        | HI          | 115.362      | 191        | H           | 1.88                 | 191        | GH          |
|                    |                  | 3 $\mu$ m             | 692.144   | 90         | FGH         | 2.2               | 90         | I           | 127.827      | 109        | H           | 1.72                 | 109        | GH          |
|                    | S/G2/M           | 50 $\mu$ m            | 833.568   | 134        | CDEF        | 2.77              | 134        | HI          | 182.34       | 133        | EF          | 1.7                  | 133        | GH          |
|                    |                  | 20 $\mu$ m            | 920.007   | 141        | BCD         | 2.13              | 141        | I           | 209.458      | 105        | DE          | 1.73                 | 105        | GH          |
|                    |                  | 10 $\mu$ m            | 869.395   | 123        | CDE         | 2.61              | 123        | HI          | 186.341      | 125        | EF          | 1.79                 | 125        | GH          |
|                    |                  | 6 $\mu$ m             | 850.348   | 121        | CDEF        | 2.75              | 121        | HI          | 181.163      | 126        | EF          | 1.93                 | 126        | GH          |
|                    |                  | 3 $\mu$ m             | 1057.62   | 72         | B           | 2.19              | 72         | HI          | 189.287      | 71         | EF          | 1.81                 | 71         | GH          |

**Supplementary Table S9: Cell migration reverts back to an unconfined state post-confinement.** Mean, cell count, and ANOVA letters (from post-hoc Tukey tests) for cell speed (Fig. 5H) and chemotactic index (Fig. 5I) across both cell cycle stages and varying degrees of confinement. Groups in a column that do not share a letter are significantly different.

|                    |                  |                       | Cell Speed |       |             | Chemotactic Index |       |             |
|--------------------|------------------|-----------------------|------------|-------|-------------|-------------------|-------|-------------|
|                    | Cell Cycle Stage | Degree of Confinement | Mean       | Count | ANOVA Value | Mean              | Count | ANOVA Value |
|                    | G1               | 2D                    | 38.84      | 178   | GHI         | 0.504             | 178   | DEF         |
|                    | S/G2/M           | 2D                    | 40.01      | 154   | FGH         | 0.474             | 154   | EF          |
| During Confinement | G1               | 50 $\mu$ m            | 115.22     | 162   | B           | 0.51              | 163   | DEF         |
|                    |                  | 20 $\mu$ m            | 131.4      | 136   | A           | 0.579             | 136   | CDE         |
|                    |                  | 10 $\mu$ m            | 104.55     | 52    | BC          | 0.767             | 52    | AB          |
|                    |                  | 6 $\mu$ m             | 100.61     | 51    | BCD         | 0.634             | 51    | ABCD        |
|                    |                  | 3 $\mu$ m             | 61.87      | 86    | E           | 0.729             | 86    | AB          |
|                    | S/G2/M           | 50 $\mu$ m            | 97.87      | 118   | CD          | 0.531             | 118   | DEF         |
|                    |                  | 20 $\mu$ m            | 107.33     | 60    | BC          | 0.611             | 60    | BCDE        |
|                    |                  | 10 $\mu$ m            | 82.7       | 66    | D           | 0.718             | 66    | ABC         |
|                    |                  | 6 $\mu$ m             | 55.2       | 64    | EF          | 0.789             | 64    | A           |
|                    |                  | 3 $\mu$ m             | 49.92      | 69    | EFG         | 0.739             | 69    | AB          |
| Post-Confinement   | G1               | 50 $\mu$ m            | 38.77073   | 150   | GHI         | 0.559             | 150   | DEF         |
|                    |                  | 20 $\mu$ m            | 32.04606   | 199   | HIJ         | 0.519             | 199   | D           |
|                    |                  | 10 $\mu$ m            | 29.16349   | 157   | HIJ         | 0.544             | 157   | DEF         |
|                    |                  | 6 $\mu$ m             | 26.87913   | 162   | J           | 0.57              | 162   | DE          |
|                    |                  | 3 $\mu$ m             | 28.47004   | 147   | HIJ         | 0.525             | 147   | DEF         |
|                    | S/G2/M           | 50 $\mu$ m            | 35.25458   | 145   | GHIJ        | 0.497             | 145   | DEF         |
|                    |                  | 20 $\mu$ m            | 28.38235   | 146   | HIJ         | 0.519             | 146   | DEF         |
|                    |                  | 10 $\mu$ m            | 27.91323   | 149   | IJ          | 0.509             | 149   | DEF         |
|                    |                  | 6 $\mu$ m             | 24.5743    | 131   | J           | 0.506             | 131   | DEF         |
|                    |                  | 3 $\mu$ m             | 24.20096   | 132   | J           | 0.449             | 132   | F           |

### **Supplementary Movie Captions:**

**Supplementary Movie 1.** Example of abnormal division event in Fucci-expressing mouse sarcoma cell in 3  $\mu\text{m}$  wide fibronectin-coated channel. Cell divides into two daughter cells, and then fuses into one multinucleated cell. Total length of movie is 1000 minutes.

**Supplementary Movie 2.** Example of abnormal division event in Fucci-expressing mouse sarcoma cell in 6  $\mu\text{m}$  wide fibronectin-coated channel. Cell divides into two daughter cells, and then fuses into one multinucleated cell. Total length of movie is 830 minutes.

**Supplementary Movie 3.** Example of abnormal division event in Fucci-expressing mouse sarcoma cell in 20  $\mu\text{m}$  wide fibronectin-coated channel. Cell divides into three individual daughter cells. Total length of movie is 250 minutes.

**Supplementary Movie 4.** Example of normal division event in Fucci-expressing mouse sarcoma cell in 10  $\mu\text{m}$  wide fibronectin-coated channel. Total length of movie 380 minutes.
